# Supplementary material
Source: Elsevier journal article supplement (https://comptes-rendus.academie-sciences.fr/chimie/article/10.1016/j.crci.2011.09.001/file/attach/mmc1.pdf)
Supplement: mmc1 [file mmc1.pdf]

## Supporting Information

1. Figure S1
2. Figure S2
3. Figure S3
4. Table S1 of absolute energies
5. XYZ Files

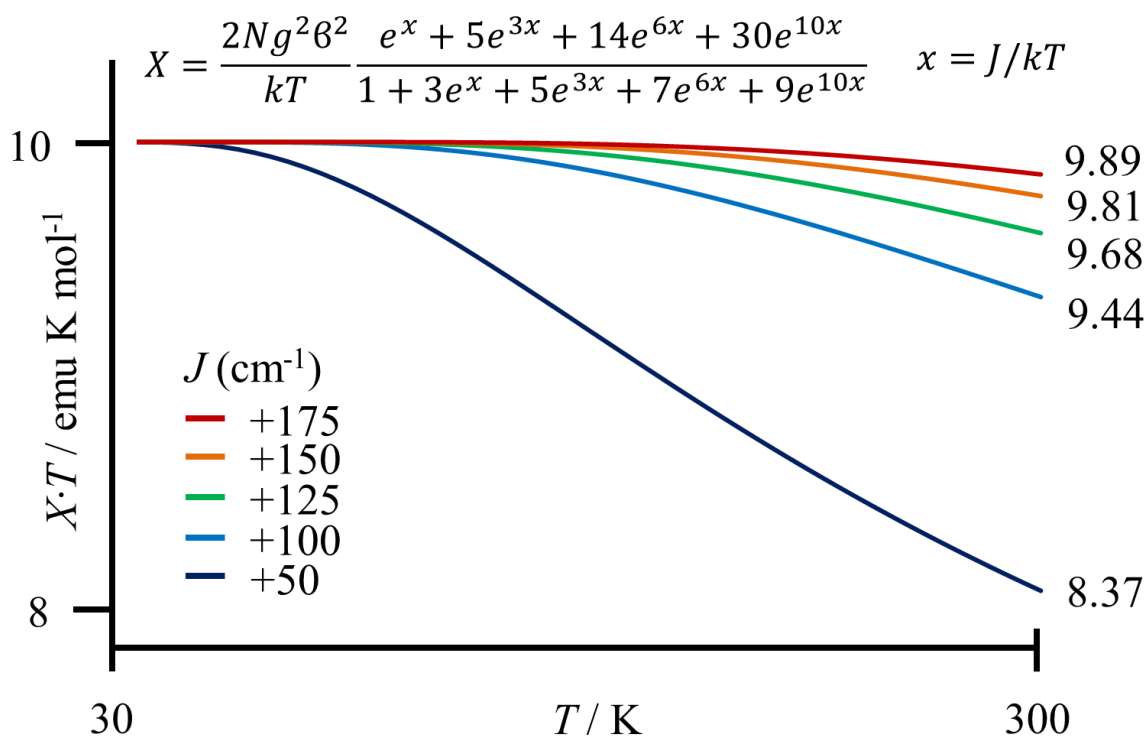

**Figure S1** Various values for  $J$ , (each value has a different color) from 30 K to room temperature (300 K). A  $J$  value of  $+125 \text{ cm}^{-1}$  (green line), reproduces the  $\chi \cdot T$  value of  $9.68 \text{ emu K mol}^{-1}$  measured for **1**.

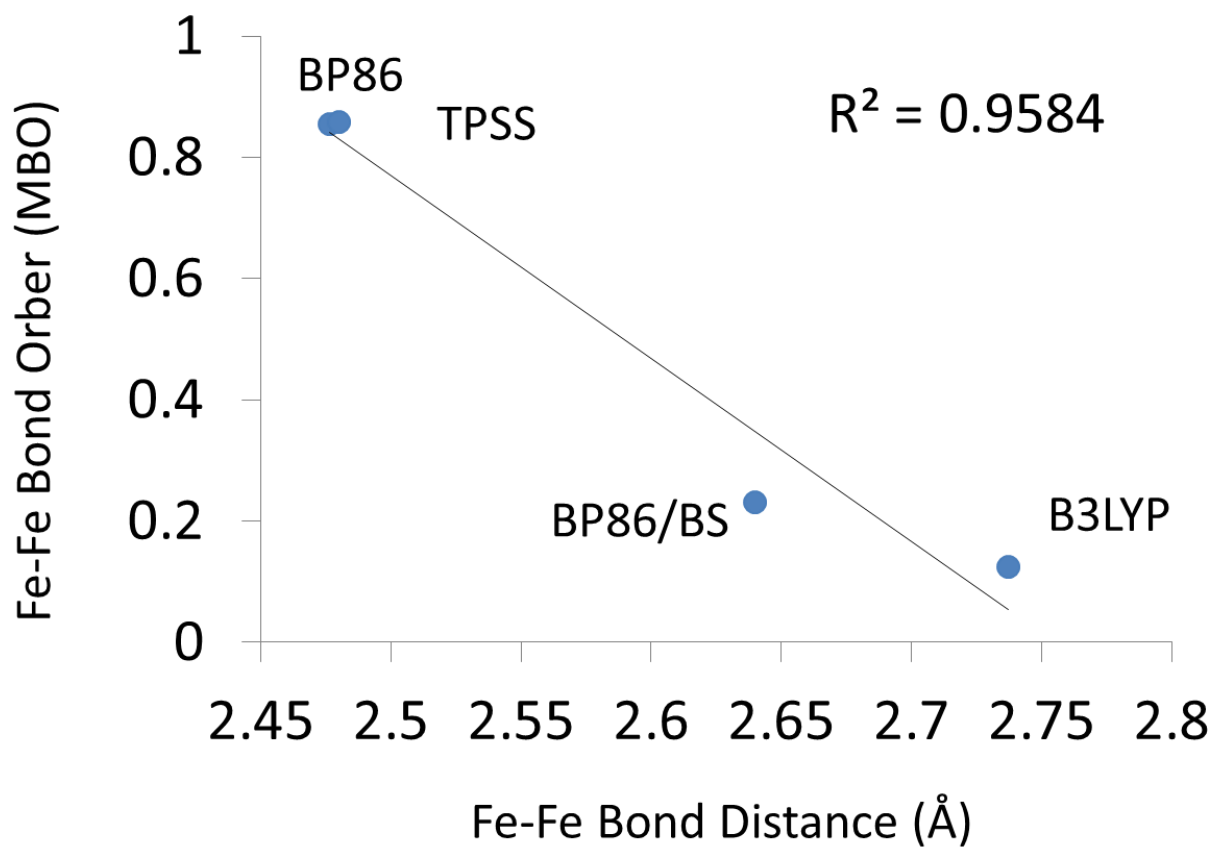

**Figure S2** The correlation between Fe-Fe bond distance and MBO from geometry optimizations of  $\text{Fe}_2(\text{TNC})_4$  with BP86, TPSS, BP/broken symmetry surface, and B3LYP.

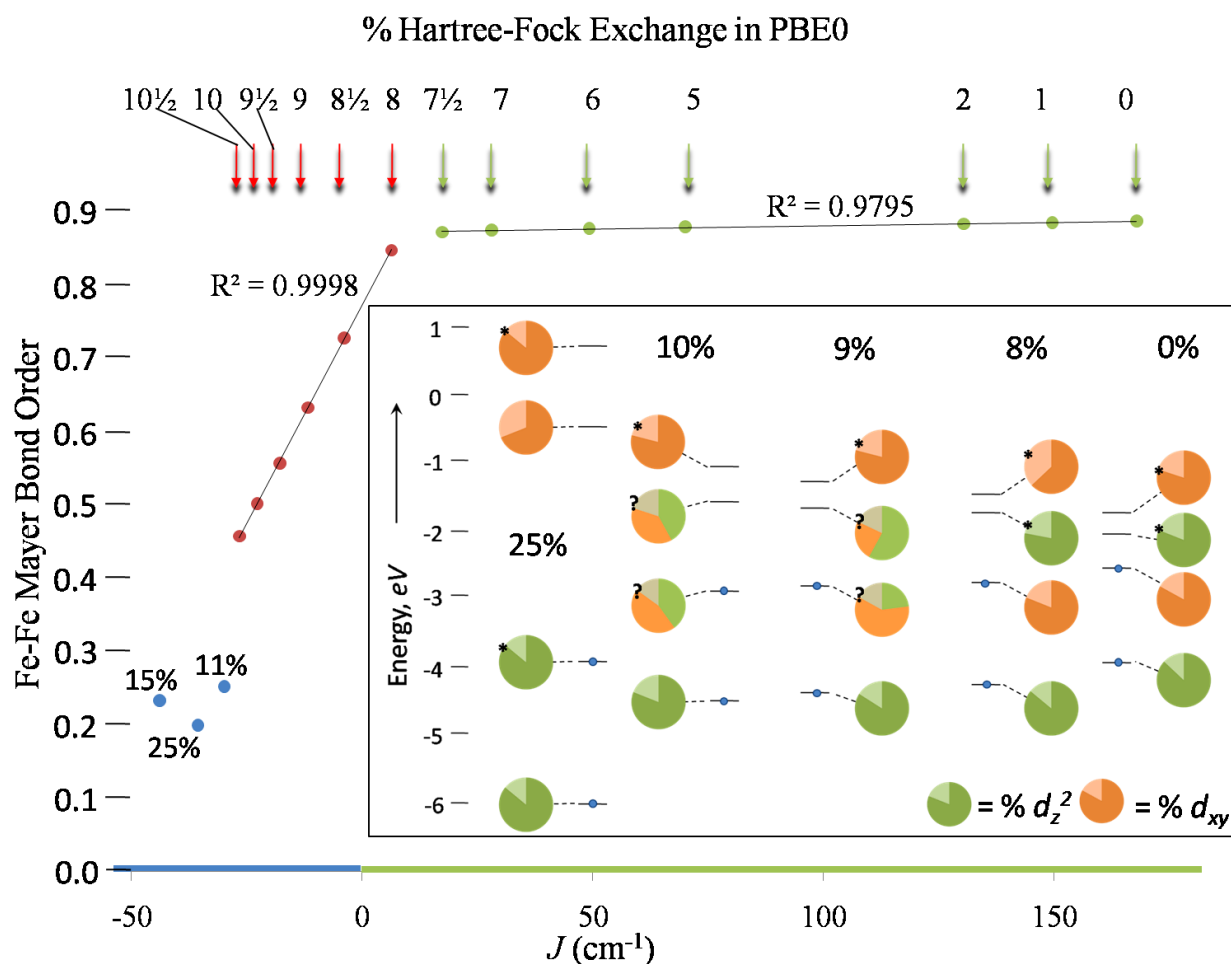

**Figure S3** The correlation between MBO of the HS calculation that precedes the BS calculation and the associated  $J$  value have been extensively studied using the  $\mathbf{1m}(D_{2d})$  model. Here the PBE0 functional has been used scaling the HF from 0% (PBE) to 25% (PBE0). The orbitals at bottom right show the effect of HF exchange on the singly-occupied sigma and delta beta spin Fe-Fe bonding and antibonding orbitals. As HF increases the sigma\* drops in energy while the delta orbital rises. At ~10% HF exchange, the occupancies switch, breaking the Fe-Fe bond, while the exchange coupling constant switches from ferromagnetic coupling to antiferromagnetic.

**Table S1** Absolute energies in hartrees for relevant  $\mathbf{1}(D_2)$  and  $\mathbf{1}(D_4)$  HS and BS calculations corresponding to Figure 3 and Table 2 of the main text.

| Functional | $\mathbf{1}(D_2)^{\text{HS}}$ | $\mathbf{1}(D_2)^{\text{BS}}$ | $\mathbf{1}(D_4)^{\text{HS}}$ | $\mathbf{1}(D_2)^{\text{BS}}$ |
|------------|-------------------------------|-------------------------------|-------------------------------|-------------------------------|
| BP86       | -5004.915103                  | -5004.897118                  | -5004.910843                  | -5004.885972                  |
| B3LYP      | -5002.798039                  | -5002.800212                  | -5002.792688                  | -5002.782877                  |
| LSD        | -4977.796957                  | -4977.770539                  | --                            | --                            |
| BLYP       | -5003.654026                  | -5003.636156                  | --                            | --                            |
| PBE        | -5000.951465                  | -5000.932679                  | --                            | --                            |
| B3LYP(5%)  | -5003.083024                  | -5003.071425                  | --                            | --                            |
| B3LYP(10%) | -5002.979022                  | -5002.974920                  | --                            | --                            |
| B3LYP(15%) | -5002.883161                  | -5002.883994                  | --                            | --                            |
| B3LYP(25%) | -5002.715038                  | -5002.717414                  | --                            | --                            |
| PBE0       | -5001.096353                  | -5001.098842                  | --                            | --                            |
| TPPS       | -5004.989914                  | -5004.977558                  | --                            | --                            |
| TPSSh      | -5004.644253                  | -5004.645127                  | --                            | --                            |
| TPSS0      | -5004.175604                  | -5004.178029                  | --                            | --                            |

# XYZ Files

## $1(D_2)$

|    |          |          |          |
|----|----------|----------|----------|
| Fe | -0.00108 | -0.00135 | -1.23061 |
| Fe | 0.00312  | 0.01135  | 1.22852  |
| N  | -2.10699 | 0.08788  | -0.56268 |
| N  | 0.06111  | 1.93922  | -1.74285 |
| N  | 2.10319  | -0.08330 | -0.58897 |
| N  | -0.07629 | 2.10755  | 0.58223  |
| N  | -1.92980 | -0.06862 | 1.76002  |
| N  | 1.94527  | 0.06317  | 1.73651  |
| N  | 0.08317  | -2.10156 | 0.56779  |
| N  | -0.08492 | -1.93540 | -1.75448 |
| C  | -2.65775 | 0.05544  | 0.64625  |
| C  | 0.04423  | -2.65860 | -0.63793 |
| C  | -0.05122 | 2.66268  | -0.62560 |
| C  | 2.66324  | -0.06010 | 0.61658  |
| C  | 2.00439  | -0.20394 | 4.14517  |
| C  | 2.59780  | 0.28369  | 2.96637  |
| C  | -3.74011 | -0.79596 | 5.51603  |
| C  | -4.33589 | -1.29141 | 4.35129  |
| C  | 2.59394  | 0.02747  | 5.38725  |
| C  | -2.55241 | -0.06108 | 5.41542  |
| C  | 3.79214  | 1.02719  | 3.07094  |
| C  | -2.97630 | 0.47688  | -1.62233 |
| C  | 2.96218  | -0.47020 | -1.65780 |
| C  | -3.73528 | 1.66047  | -1.54273 |
| C  | -3.75618 | -1.05940 | 3.10164  |
| C  | 3.04528  | 0.32028  | -2.81663 |
| C  | -3.07495 | -0.31373 | -2.77978 |
| C  | 3.72526  | -1.65177 | -1.58693 |
| C  | -4.57510 | 2.03847  | -2.59223 |
| C  | -3.91251 | 0.07283  | -3.82924 |
| C  | 3.87149  | -0.06449 | -3.87574 |
| C  | -4.66516 | 1.24876  | -3.74329 |
| C  | 4.55381  | -2.02786 | -2.64598 |
| C  | -2.57061 | -0.30246 | 2.99316  |
| C  | -1.97432 | 0.18460  | 4.17074  |
| C  | 4.62841  | -1.23824 | -3.79820 |
| C  | 3.79035  | 0.74853  | 5.48383  |
| C  | 4.38310  | 1.24488  | 4.31792  |

|   |          |          |          |
|---|----------|----------|----------|
| C | 0.07420  | -3.89294 | 3.84254  |
| C | -0.21459 | 1.99885  | -4.15099 |
| C | -1.62800 | 3.74641  | 1.57858  |
| C | -0.31450 | -3.06018 | 2.79005  |
| C | -1.07492 | -3.76955 | -3.08679 |
| C | -1.99376 | 4.58196  | 2.63577  |
| C | 1.25075  | -4.64478 | 3.75828  |
| C | -1.31133 | -4.35248 | -4.33411 |
| C | 0.02273  | 2.58247  | -5.39475 |
| C | -0.45286 | 2.97345  | 1.64924  |
| C | -1.20052 | 4.65348  | 3.78583  |
| C | 0.47437  | -2.96576 | 1.63107  |
| C | 0.28717  | 2.58581  | -2.97494 |
| C | 0.34106  | 3.05339  | 2.80585  |
| C | -0.03354 | 3.88641  | 3.86318  |
| C | 2.03892  | -4.55876 | 2.60593  |
| C | -0.32328 | -2.58000 | -2.98483 |
| C | 1.65843  | -3.72413 | 1.55310  |
| C | 0.76378  | 3.76627  | -5.49570 |
| C | -0.82597 | -3.75627 | -5.50289 |
| C | 1.04998  | 3.76745  | -3.08387 |
| C | 1.27373  | 4.35264  | -4.33250 |
| C | -0.09671 | -2.56463 | -5.40862 |
| C | 0.15354  | -1.98328 | -4.16636 |
| H | 0.13962  | -3.75137 | -0.72020 |
| H | -0.14229 | 3.75580  | -0.70693 |
| H | 3.75567  | -0.16186 | 0.69467  |
| H | -3.75009 | 0.15155  | 0.73367  |
| H | 1.08470  | -0.78672 | 4.06942  |
| H | 2.11818  | -0.36737 | 6.28644  |
| H | -3.64603 | 2.28771  | -0.65446 |
| H | 2.48182  | 1.25147  | -2.86764 |
| H | -2.51485 | -1.24659 | -2.83685 |
| H | 3.64786  | -2.27956 | -0.69799 |
| H | -5.15314 | 2.96088  | -2.51427 |
| H | -3.98321 | -0.55960 | -4.71525 |
| H | -4.19092 | -0.98752 | 6.49078  |
| H | 3.92985  | 0.56754  | -4.76292 |
| H | 4.23730  | 1.46346  | 2.17566  |
| H | -5.31637 | 1.54838  | -4.56588 |
| H | 5.13475  | -2.94904 | -2.57475 |
| H | -5.25119 | -1.88248 | 4.41421  |
| H | 5.27052  | -1.53651 | -4.62834 |
| H | -2.07473 | 0.33317  | 6.31381  |
| H | 4.25032  | 0.92870  | 6.45648  |
| H | 5.30537  | 1.82537  | 4.37808  |

|   |          |          |          |
|---|----------|----------|----------|
| H | -4.20295 | -1.49493 | 2.20675  |
| H | -1.06149 | 0.77761  | 4.09189  |
| H | -0.81253 | 1.08925  | -4.07155 |
| H | -2.25880 | 3.67142  | 0.69153  |
| H | -2.90973 | 5.17108  | 2.56486  |
| H | -1.50303 | -4.21730 | -2.18883 |
| H | -0.38305 | 2.11218  | -6.29186 |
| H | -1.49085 | 5.30133  | 4.61439  |
| H | -0.55685 | -3.96049 | 4.72975  |
| H | -1.89786 | -5.27106 | -4.39197 |
| H | 1.26735  | 2.48194  | 2.85641  |
| H | 0.60136  | 3.94219  | 4.74848  |
| H | -1.24760 | -2.50043 | 2.84625  |
| H | 1.55209  | -5.29200 | 4.58337  |
| H | 0.94869  | 4.22146  | -6.46970 |
| H | -1.02082 | -4.20990 | -6.47573 |
| H | 2.96194  | -5.13602 | 2.52934  |
| H | 1.86956  | 5.26479  | -4.39601 |
| H | 1.49654  | 4.20681  | -2.19077 |
| H | 2.28428  | -3.63844 | 0.66359  |
| H | 0.28978  | -2.08634 | -6.31008 |
| H | 0.74221  | -1.06719 | -4.09276 |

## $\mathbf{1}(D_4)$

|    |          |          |          |
|----|----------|----------|----------|
| Fe | 0.00000  | 0.00000  | -1.16178 |
| Fe | 0.00000  | 0.00000  | 1.16178  |
| N  | -0.37997 | -2.08395 | -1.10258 |
| N  | -2.08395 | 0.37997  | -1.10258 |
| N  | 2.08395  | -0.37997 | -1.10258 |
| N  | 0.37997  | 2.08395  | -1.10258 |
| N  | -2.08395 | -0.37997 | 1.10258  |
| N  | 0.37997  | -2.08395 | 1.10258  |
| N  | -0.37997 | 2.08395  | 1.10258  |
| N  | 2.08395  | 0.37997  | 1.10258  |
| C  | 0.00000  | -2.72547 | 0.00000  |
| C  | 2.72547  | 0.00000  | 0.00000  |
| C  | -2.72547 | 0.00000  | 0.00000  |
| C  | 0.00000  | 2.72547  | 0.00000  |
| C  | 2.53319  | 0.81311  | 3.45156  |
| C  | 2.80836  | 1.06983  | 2.09503  |
| C  | -4.17719 | -2.45829 | 4.13752  |
| C  | -4.45794 | -2.72225 | 2.79259  |
| C  | 3.20968  | 1.49904  | 4.45928  |
| C  | -3.20968 | -1.49904 | 4.45928  |

|   |          |          |          |
|---|----------|----------|----------|
| C | 3.77795  | 2.04380  | 1.77892  |
| C | -2.80836 | 1.06983  | -2.09503 |
| C | 2.80836  | -1.06983 | -2.09503 |
| C | -3.77795 | 2.04380  | -1.77892 |
| C | -3.77795 | -2.04380 | 1.77892  |
| C | 2.53319  | -0.81311 | -3.45156 |
| C | -2.53319 | 0.81311  | -3.45156 |
| C | 3.77795  | -2.04380 | -1.77892 |
| C | -4.45794 | 2.72225  | -2.79259 |
| C | -3.20968 | 1.49904  | -4.45928 |
| C | 3.20968  | -1.49904 | -4.45928 |
| C | -4.17719 | 2.45829  | -4.13752 |
| C | 4.45794  | -2.72225 | -2.79259 |
| C | -2.53319 | -0.81311 | 3.45156  |
| C | 4.17719  | -2.45829 | -4.13752 |
| C | 4.17719  | 2.45829  | 4.13752  |
| C | 4.45794  | 2.72225  | 2.79259  |
| C | -2.80836 | -1.06983 | 2.09503  |
| C | -0.81311 | -2.53319 | -3.45156 |
| C | 2.04380  | 3.77795  | -1.77892 |
| C | 2.72225  | 4.45794  | -2.79259 |
| C | -1.49904 | -3.20968 | -4.45928 |
| C | -1.49904 | 3.20968  | 4.45928  |
| C | -0.81311 | 2.53319  | 3.45156  |
| C | -2.45829 | 4.17719  | 4.13752  |
| C | 2.04380  | -3.77795 | 1.77892  |
| C | 2.45829  | 4.17719  | -4.13752 |
| C | 2.72225  | -4.45794 | 2.79259  |
| C | -1.06983 | 2.80836  | 2.09503  |
| C | 1.06983  | 2.80836  | -2.09503 |
| C | -2.45829 | -4.17719 | -4.13752 |
| C | 1.06983  | -2.80836 | 2.09503  |
| C | -2.72225 | 4.45794  | 2.79259  |
| C | -1.06983 | -2.80836 | -2.09503 |
| C | 2.45829  | -4.17719 | 4.13752  |
| C | -2.04380 | 3.77795  | 1.77892  |
| C | 0.81311  | -2.53319 | 3.45156  |
| C | 1.49904  | -3.20968 | 4.45928  |
| C | 1.49904  | 3.20968  | -4.45928 |
| C | -2.72225 | -4.45794 | -2.79259 |
| C | 0.81311  | 2.53319  | -3.45156 |
| C | -2.04380 | -3.77795 | -1.77892 |
| H | 3.82683  | 0.00000  | 0.00000  |
| H | -3.82683 | 0.00000  | 0.00000  |
| H | 0.00000  | 3.82683  | 0.00000  |
| H | 0.00000  | -3.82683 | 0.00000  |



|   |          |          |          |
|---|----------|----------|----------|
| H | 1.81679  | 0.02775  | 3.70014  |
| H | 2.98896  | 1.27536  | 5.50438  |
| H | -3.97344 | 2.28179  | -0.73196 |
| H | 1.81679  | -0.02775 | -3.70014 |
| H | -1.81679 | 0.02775  | -3.70014 |
| H | 3.97344  | -2.28179 | -0.73196 |
| H | -5.20214 | 3.47552  | -2.52816 |
| H | -2.98896 | 1.27536  | -5.50438 |
| H | -4.70348 | -2.99684 | 4.92665  |
| H | 2.98896  | -1.27536 | -5.50438 |
| H | 3.97344  | 2.28179  | 0.73196  |
| H | -4.70348 | 2.99684  | -4.92665 |
| H | 5.20214  | -3.47552 | -2.52816 |
| H | -5.20214 | -3.47552 | 2.52816  |
| H | 4.70348  | -2.99684 | -4.92665 |
| H | -2.98896 | -1.27536 | 5.50438  |
| H | 4.70348  | 2.99684  | 4.92665  |
| H | 5.20214  | 3.47552  | 2.52816  |
| H | -3.97344 | -2.28179 | 0.73196  |
| H | -1.81679 | -0.02775 | 3.70014  |
| H | -0.02775 | -1.81679 | -3.70014 |
| H | -1.27536 | -2.98896 | -5.50438 |
| H | 2.28179  | 3.97344  | -0.73196 |
| H | 2.28179  | -3.97344 | 0.73196  |
| H | 3.47552  | 5.20214  | -2.52816 |
| H | 3.47552  | -5.20214 | 2.52816  |
| H | -2.99684 | -4.70348 | -4.92665 |
| H | 2.99684  | -4.70348 | 4.92665  |
| H | -1.27536 | 2.98896  | 5.50438  |
| H | 0.02775  | -1.81679 | 3.70014  |
| H | 2.99684  | 4.70348  | -4.92665 |
| H | -0.02775 | 1.81679  | 3.70014  |
| H | 1.27536  | -2.98896 | 5.50438  |
| H | -2.99684 | 4.70348  | 4.92665  |
| H | -3.47552 | 5.20214  | 2.52816  |
| H | -3.47552 | -5.20214 | -2.52816 |
| H | 1.27536  | 2.98896  | -5.50438 |
| H | -2.28179 | -3.97344 | -0.73196 |
| H | -2.28179 | 3.97344  | 0.73196  |
| H | 0.02775  | 1.81679  | -3.70014 |

## $1\mathbf{m}(D_{4h})$

|    |          |          |           |
|----|----------|----------|-----------|
| Fe | 0.000000 | 0.000000 | -1.213642 |
| Fe | 0.000000 | 0.000000 | 1.213642  |

|   |           |           |           |
|---|-----------|-----------|-----------|
| N | 0.000000  | -2.114186 | -1.164396 |
| N | -2.114186 | 0.000000  | -1.164396 |
| N | 2.114186  | 0.000000  | -1.164396 |
| N | 0.000000  | 2.114186  | -1.164396 |
| N | -2.114186 | 0.000000  | 1.164396  |
| N | 0.000000  | -2.114186 | 1.164396  |
| N | 0.000000  | 2.114186  | 1.164396  |
| N | 2.114186  | 0.000000  | 1.164396  |
| C | 0.000000  | -2.747975 | 0.000000  |
| C | 2.747975  | 0.000000  | 0.000000  |
| C | -2.747975 | 0.000000  | 0.000000  |
| C | 0.000000  | 2.747975  | 0.000000  |
| H | 0.000000  | -2.754224 | -1.958071 |
| H | -2.754224 | 0.000000  | -1.958071 |
| H | 2.754224  | 0.000000  | -1.958071 |
| H | 0.000000  | 2.754224  | -1.958071 |
| H | 2.754224  | 0.000000  | 1.958071  |
| H | 0.000000  | 2.754224  | 1.958071  |
| H | 0.000000  | -2.754224 | 1.958071  |
| H | -2.754224 | 0.000000  | 1.958071  |
| H | 3.852971  | 0.000000  | 0.000000  |
| H | -3.852971 | 0.000000  | 0.000000  |
| H | 0.000000  | 3.852971  | 0.000000  |
| H | 0.000000  | -3.852971 | 0.000000  |

## $\mathbf{1m}(D_{2d})$

|    |          |          |          |
|----|----------|----------|----------|
| Fe | -0.00464 | -0.00429 | -1.24518 |
| Fe | 0.00464  | 0.00429  | 1.24518  |
| N  | -2.03781 | -0.00834 | -0.54890 |
| N  | -0.01272 | 1.93597  | -1.76724 |
| N  | -0.00040 | -1.94810 | -1.75391 |
| N  | 2.03366  | 0.00451  | -0.56412 |
| N  | -0.00438 | 2.03765  | 0.54952  |
| N  | -1.93547 | -0.00007 | 1.76783  |
| N  | 1.94859  | 0.01219  | 1.75332  |
| N  | 0.00853  | -2.03382 | 0.56349  |
| C  | -2.63779 | -0.00619 | 0.63284  |
| C  | 0.00605  | -2.64226 | -0.61391 |
| C  | -0.01069 | 2.63797  | -0.63203 |
| C  | 2.64244  | 0.01048  | 0.61311  |
| H  | -2.71265 | -0.01311 | -1.31596 |
| H  | -0.01767 | 2.51147  | -2.60637 |
| H  | -0.00169 | -2.52936 | -2.58907 |
| H  | 2.70277  | 0.00398  | -1.33620 |
| H  | 0.01352  | -2.70315 | 1.33537  |

|   |          |          |          |
|---|----------|----------|----------|
| H | 2.53009  | 0.01690  | 2.58830  |
| H | -2.51073 | 0.00099  | 2.60714  |
| H | -0.00364 | 2.71228  | 1.31679  |
| H | 0.00937  | -3.74453 | -0.65599 |
| H | -0.01435 | 3.73993  | -0.68168 |
| H | 3.74472  | 0.01412  | 0.65485  |
| H | -3.73973 | -0.00951 | 0.68282  |

XYZ of Fe<sub>2</sub>(TNC)<sub>4</sub> BP86 geometry optimization with Fe-Fe distance of 2.48 Å.

|    |           |           |           |
|----|-----------|-----------|-----------|
| Fe | -0.001488 | 0.011217  | -1.239760 |
| Fe | 0.009574  | -0.003965 | 1.241589  |
| N  | -0.039387 | -2.016850 | -0.575440 |
| N  | -1.930539 | 0.051883  | -1.738995 |
| N  | 1.922535  | -0.022758 | -1.757555 |
| N  | 0.041564  | 2.031172  | -0.550751 |
| N  | -2.017357 | 0.040357  | 0.572801  |
| N  | -0.025024 | -1.933874 | 1.736516  |
| N  | 0.049846  | 1.919576  | 1.759929  |
| N  | 2.030716  | -0.040546 | 0.553161  |
| C  | -0.046697 | -2.627842 | 0.599478  |
| C  | 2.628983  | -0.045816 | -0.628331 |
| C  | -2.626442 | 0.060296  | -0.602977 |
| C  | 0.059543  | 2.627626  | 0.631483  |
| H  | -0.061090 | -2.679704 | -1.352411 |
| H  | -2.505256 | 0.070280  | -2.578052 |
| H  | 2.489351  | -0.030034 | -2.602140 |
| H  | 0.052749  | 2.703562  | -1.319698 |
| H  | 2.701873  | -0.063218 | 1.322942  |
| H  | 0.067112  | 2.485267  | 2.605120  |
| H  | -0.034407 | -2.510058 | 2.574715  |
| H  | -2.681554 | 0.051954  | 1.348849  |
| H  | 3.732006  | -0.070336 | -0.681850 |
| H  | -3.729933 | 0.084765  | -0.645891 |
| H  | 0.083366  | 3.730586  | 0.686480  |
| H  | -0.071864 | -3.731371 | 0.640910  |

XYZ Fe<sub>2</sub>(TNC)<sub>4</sub> TPSS geometry optimization with Fe-Fe distance of 2.48 Å.

|    |           |           |           |
|----|-----------|-----------|-----------|
| Fe | -0.001401 | 0.011366  | -1.237524 |
| Fe | 0.009729  | -0.003897 | 1.238686  |
| N  | -0.038374 | -2.003744 | -0.568754 |
| N  | -1.928317 | 0.051909  | -1.740509 |
| N  | 1.920489  | -0.022903 | -1.759625 |
| N  | 0.040853  | 2.018282  | -0.544254 |
| N  | -2.004382 | 0.039460  | 0.566433  |

|   |           |           |           |
|---|-----------|-----------|-----------|
| N | -0.025235 | -1.931635 | 1.738359  |
| N | 0.049642  | 1.917429  | 1.761715  |
| N | 2.017670  | -0.039713 | 0.546452  |
| C | -0.046700 | -2.622040 | 0.601035  |
| C | 2.623283  | -0.045908 | -0.629953 |
| C | -2.620714 | 0.060161  | -0.604271 |
| C | 0.059311  | 2.622004  | 0.632983  |
| H | -0.059449 | -2.664381 | -1.345207 |
| H | -2.504813 | 0.071322  | -2.575783 |
| H | 2.489275  | -0.031287 | -2.600341 |
| H | 0.052095  | 2.688464  | -1.312673 |
| H | 2.686595  | -0.061895 | 1.315739  |
| H | 0.067306  | 2.484934  | 2.603157  |
| H | -0.035597 | -2.509639 | 2.572748  |
| H | -2.666378 | 0.050369  | 1.341936  |
| H | 3.721093  | -0.070735 | -0.677607 |
| H | -3.718934 | 0.084783  | -0.641533 |
| H | 0.083180  | 3.719760  | 0.682219  |
| H | -0.072048 | -3.720296 | 0.636691  |

XYZ Fe<sub>2</sub>(TNC)<sub>4</sub> BP/broken symmetry surface geometry optimization with Fe-Fe distance of 2.64 Å.

|    |           |           |           |
|----|-----------|-----------|-----------|
| Fe | -0.002338 | 0.011992  | -1.320416 |
| Fe | 0.010423  | -0.004620 | 1.320205  |
| N  | -0.038691 | -2.026384 | -0.635763 |
| N  | -1.961590 | 0.052457  | -1.695553 |
| N  | 1.953311  | -0.023943 | -1.713887 |
| N  | 0.040064  | 2.041747  | -0.611279 |
| N  | -2.026917 | 0.038818  | 0.633063  |
| N  | -0.026300 | -1.964424 | 1.692957  |
| N  | 0.050133  | 1.950421  | 1.716514  |
| N  | 2.041226  | -0.039891 | 0.614018  |
| C  | -0.047059 | -2.632019 | 0.540705  |
| C  | 2.633666  | -0.046377 | -0.569177 |
| C  | -2.630861 | 0.060051  | -0.544077 |
| C  | 0.059299  | 2.632475  | 0.572615  |
| H  | -0.059382 | -2.700944 | -1.403241 |
| H  | -2.564791 | 0.073180  | -2.514868 |
| H  | 2.548647  | -0.033865 | -2.539149 |
| H  | 0.051625  | 2.726016  | -1.370314 |
| H  | 2.724358  | -0.061569 | 1.373854  |
| H  | 0.069508  | 2.544527  | 2.542493  |
| H  | -0.037550 | -2.568822 | 2.511579  |
| H  | -2.702595 | 0.049761  | 1.399759  |
| H  | 3.738204  | -0.071865 | -0.612868 |

|   |           |           |           |
|---|-----------|-----------|-----------|
| H | -3.735791 | 0.085461  | -0.576656 |
| H | 0.084314  | 3.736971  | 0.617650  |
| H | -0.072730 | -3.736984 | 0.571957  |

XYZ Fe<sub>2</sub>(TNC)<sub>4</sub> B3LYP geometry optimization with Fe-Fe distance of 2.73 Å.

|    |           |           |           |
|----|-----------|-----------|-----------|
| Fe | -0.001488 | 0.011217  | -1.239760 |
| Fe | 0.009574  | -0.003965 | 1.241589  |
| N  | -0.039387 | -2.016850 | -0.575440 |
| N  | -1.930539 | 0.051883  | -1.738995 |
| N  | 1.922535  | -0.022758 | -1.757555 |
| N  | 0.041564  | 2.031172  | -0.550751 |
| N  | -2.017357 | 0.040357  | 0.572801  |
| N  | -0.025024 | -1.933874 | 1.736516  |
| N  | 0.049846  | 1.919576  | 1.759929  |
| N  | 2.030716  | -0.040546 | 0.553161  |
| C  | -0.046697 | -2.627842 | 0.599478  |
| C  | 2.628983  | -0.045816 | -0.628331 |
| C  | -2.626442 | 0.060296  | -0.602977 |
| C  | 0.059543  | 2.627626  | 0.631483  |
| H  | -0.061090 | -2.679704 | -1.352411 |
| H  | -2.505256 | 0.070280  | -2.578052 |
| H  | 2.489351  | -0.030034 | -2.602140 |
| H  | 0.052749  | 2.703562  | -1.319698 |
| H  | 2.701873  | -0.063218 | 1.322942  |
| H  | 0.067112  | 2.485267  | 2.605120  |
| H  | -0.034407 | -2.510058 | 2.574715  |
| H  | -2.681554 | 0.051954  | 1.348849  |
| H  | 3.732006  | -0.070336 | -0.681850 |
| H  | -3.729933 | 0.084765  | -0.645891 |
| H  | 0.083366  | 3.730586  | 0.686480  |
| H  | -0.071864 | -3.731371 | 0.640910  |
